# Supplementary material
Source: PubMed Central journal article supplement (PMC4222025)
Supplement: NIHMS632981-supplement-Supp_Data_01.pdf [file NIHMS632981-supplement-Supp_Data_01.pdf]

# Functional differences among BRCA1 missense mutations in the control of centrosome duplication

Running title: BRCA1 missense mutants and the centrosome

Zeina Kais, Natsuko Chiba, Chikashi Ishioka, Jeffrey D. Parvin

## SUPPLEMENTARY INFORMATION

### ***Supplementary Figure S1***

- A.** Results of the centrosome amplification assay with BRCA1 substitution variants. Control or BRCA1 3'-UTR siRNA were transfected into MCF7 cells along with GFP-Centrin 2 and the indicated BRCA1 mutant plasmid. The Histogram shows the percentage of MCF7 cells with centrosome amplifications after the substitution of BRCA1 with the indicated BRCA1 variant.
- B.** A histogram showing the number of MCF7 cells with centrosome amplification that also had paired centrioles upon the introduction of the L52F variant as compared to the M18T variant.

### ***Supplementary Figure S2***

Quantitative densitometry of the protein expression level of BRCA1 normalized to tubulin protein expression.

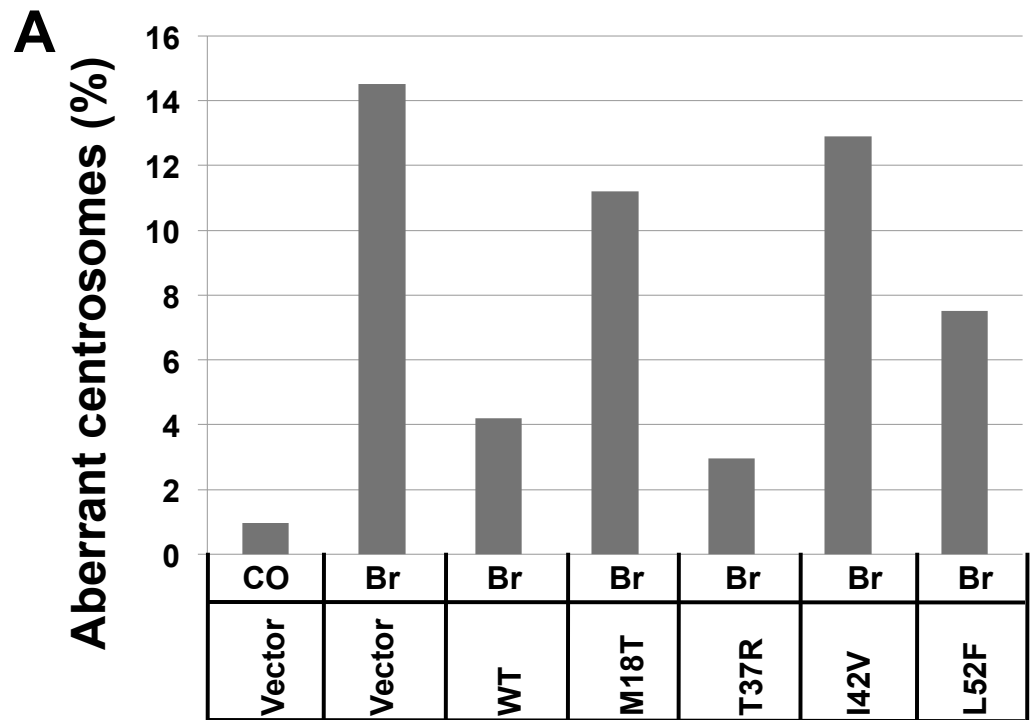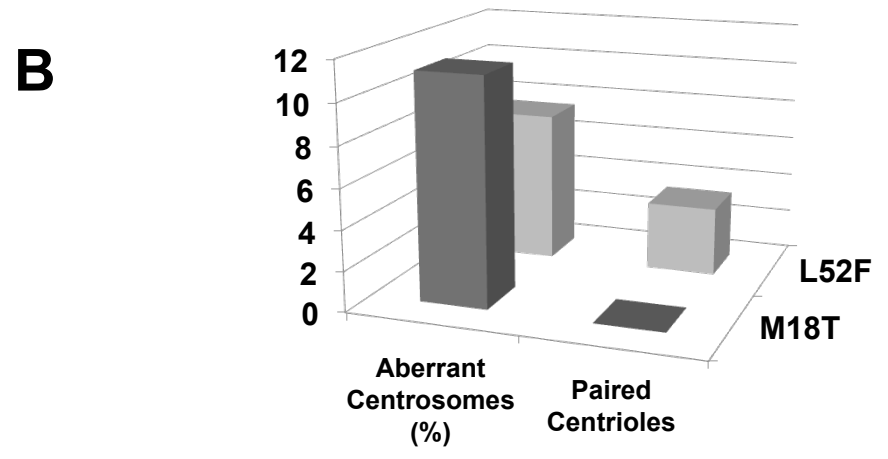

Supp. Figure S1

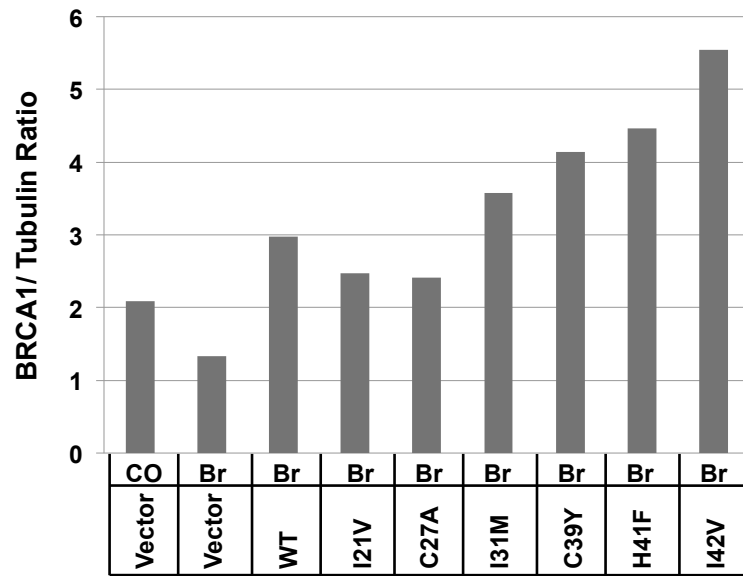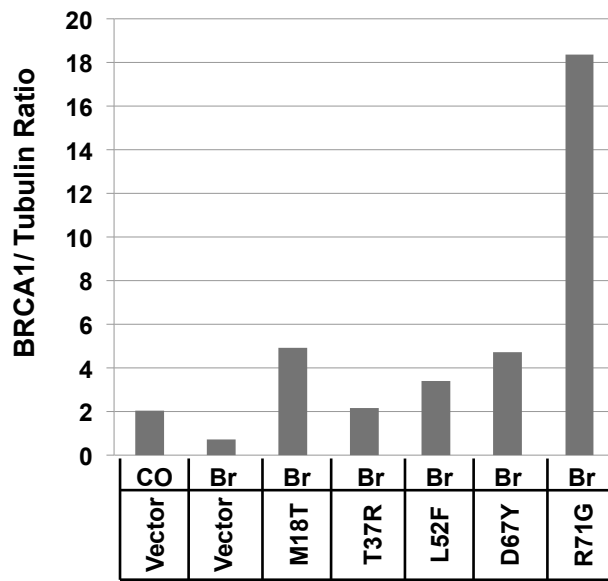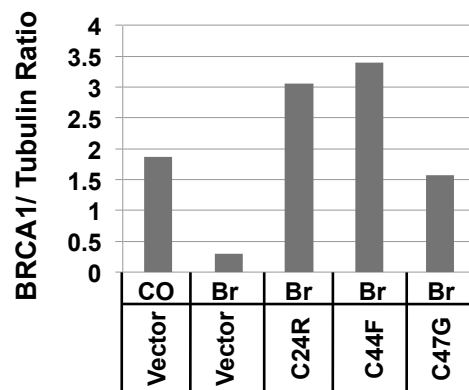

Supp. Figure S2
